# Supplementary figures and images for: High DAPK1 Expression Promotes Tumor Metastasis of Gastric Cancer
Source: MDPI journal article supplement (doi:10.3390/biology11101488), 2022-10-11

Figure 4A

DAPK1

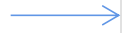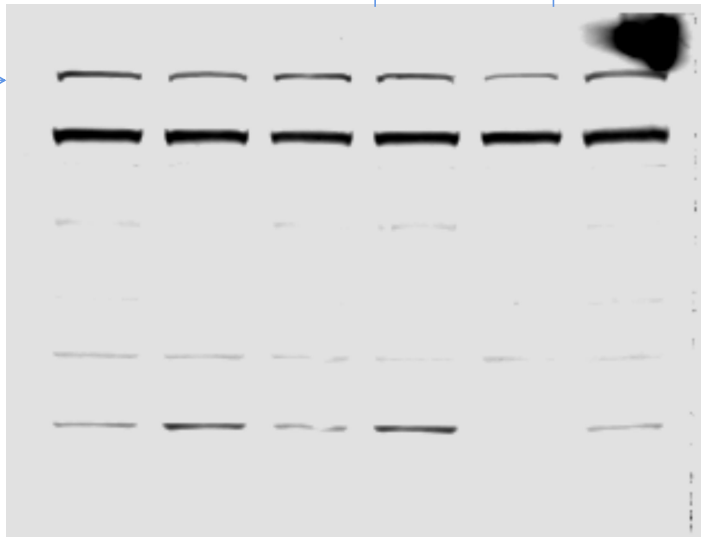

GAPDH

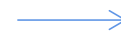

Figure 4A

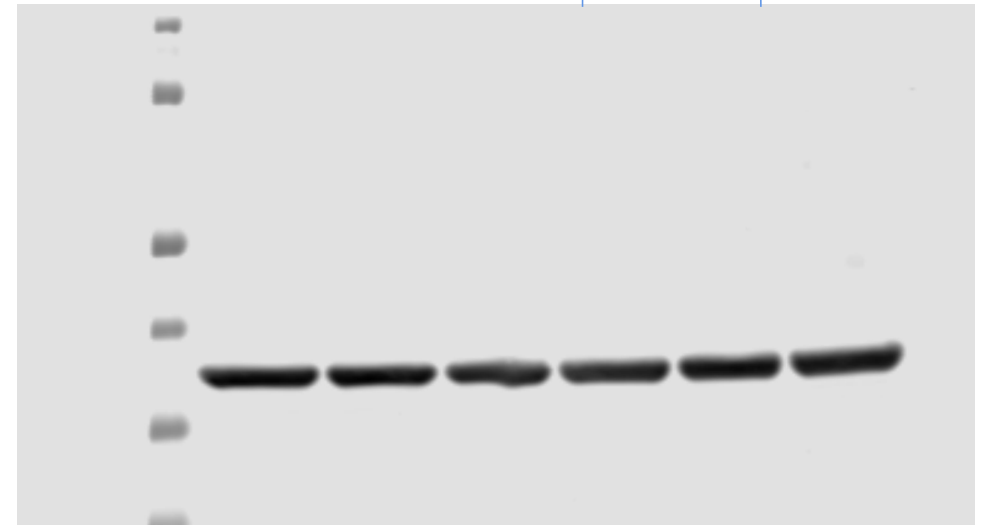

Supplement: s1 [file s1]

Figure 5A

HA-DAPK1

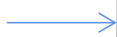

GAPDH

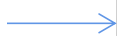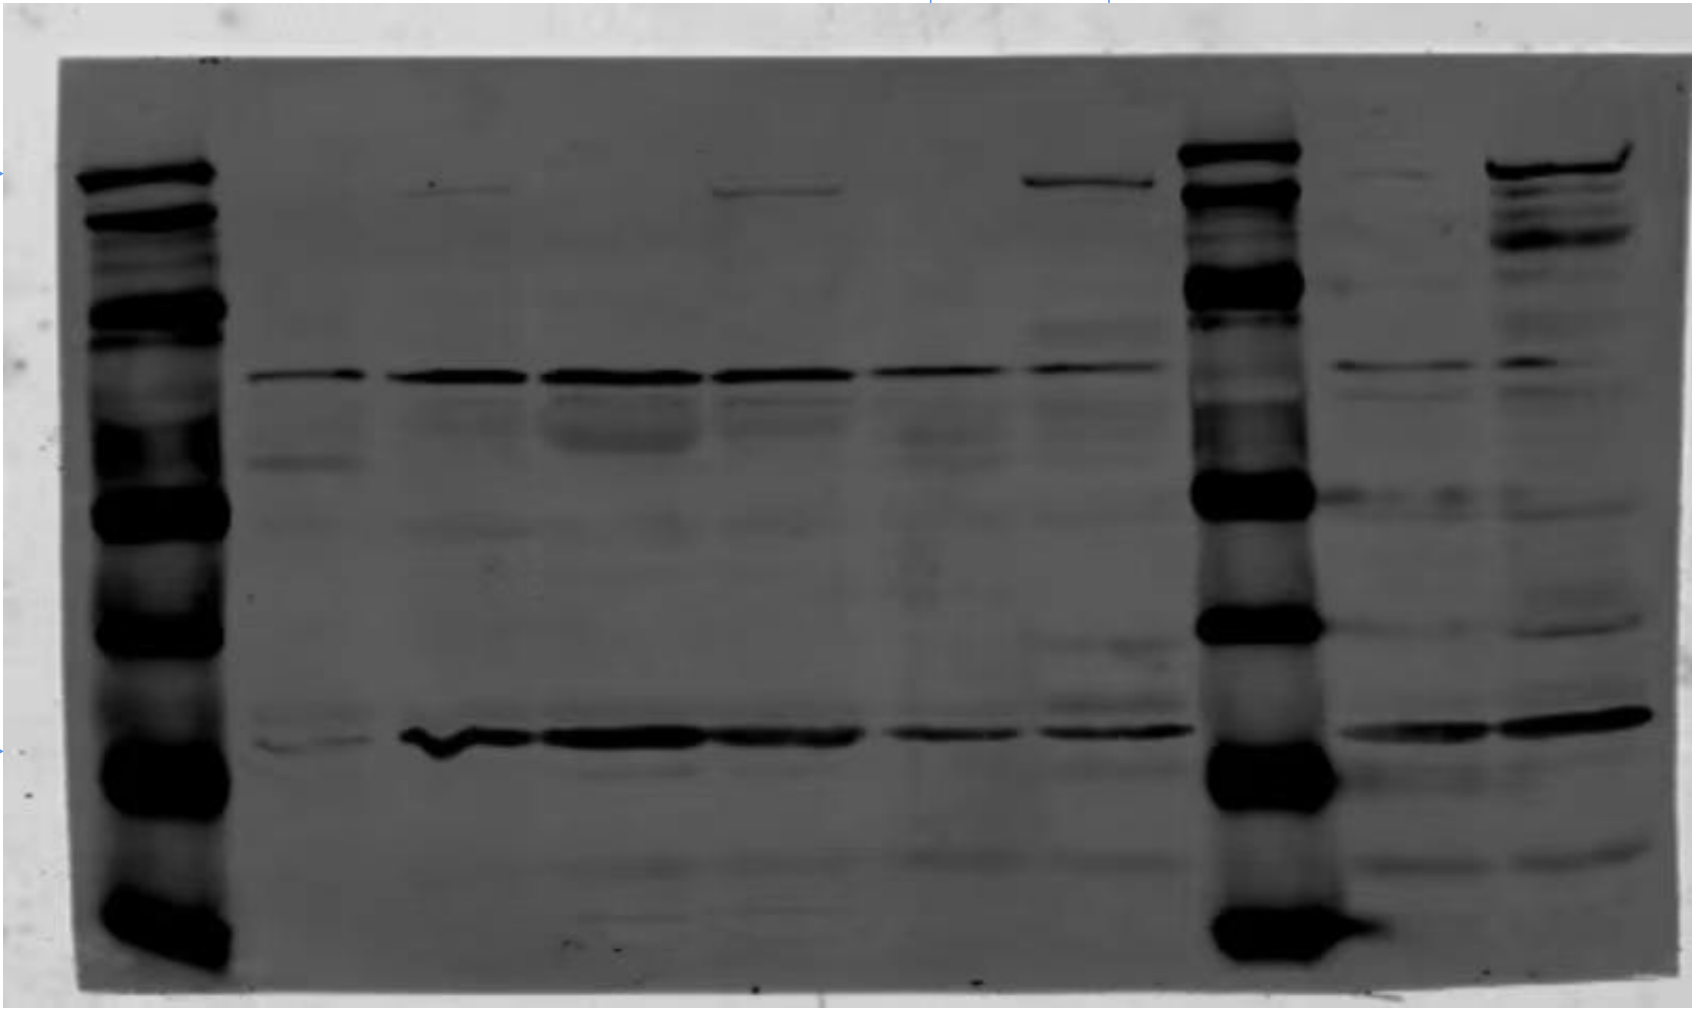

Supplement: s1 [file s1]
